# Supplementary material
Source: MDPI journal article supplement (https://www.mdpi.com/2311-7524/8/6/536)
Supplement: s1 [file s1]

Table S1 Results of two-way ANOVA for tomato growth, physiology, quality, yield and WUE

| Index | Ph      |         |              | St      |         |              | RL         |         |              | RS        |         |              |
|-------|---------|---------|--------------|---------|---------|--------------|------------|---------|--------------|-----------|---------|--------------|
|       | sum.III | F-value | significance | sum.III | F-value | significance | sum.III    | F-value | significance | sum.III   | F-value | significance |
| W     | 2778.95 | 780.60  | <0.01        | 20.38   | 21.98   | <0.01        | 5290316.26 | 3112.79 | <0.01        | 170236.82 | 1812.80 | <0.01        |
| Z     | 557.89  | 104.47  | <0.01        | 3.09    | 2.22    | 0.112        | 348892.52  | 136.86  | <0.01        | 16600.85  | 117.85  | <0.01        |
| W*Z   | 170.54  | 15.97   | <0.01        | 0.54    | 0.20    | 0.975        | 157083.72  | 30.81   | <0.01        | 3818.61   | 13.55   | <0.01        |
| Index | RV      |         |              | LAI     |         |              | Ci         |         |              | Pn        |         |              |
|       | sum.III | F-value | significance | sum.III | F-value | significance | sum.III    | F-value | significance | sum.III   | F-value | significance |
| W     | 28.87   | 167.69  | <0.01        | 5.889   | 136.28  | <0.01        | 7994.00    | 88.28   | <0.01        | 127.48    | 100.69  | <0.01        |
| Z     | 1.54    | 5.95    | <0.01        | 1.044   | 16.10   | <0.01        | 2138.08    | 15.74   | <0.01        | 28.14     | 14.82   | <0.01        |
| W*Z   | 0.55    | 1.07    | 0.410        | 0.511   | 3.94    | 0.021        | 812.00     | 2.99    | 0.025        | 4.19      | 1.10    | 0.39         |
| Index | Tr      |         |              | Gs      |         |              | Ff         |         |              | NC        |         |              |
|       | sum.III | F-value | significance | sum.III | F-value | significance | sum.III    | F-value | significance | sum.III   | F-value | significance |
| W     | 20.14   | 177.56  | <0.01        | 0.10    | 178.88  | <0.01        | 1.36       | 103.96  | <0.01        | 244.37    | 5675.74 | <0.01        |
| Z     | 4.58    | 26.95   | <0.01        | 0.02    | 26.19   | <0.01        | 0.13       | 6.58    | <0.01        | 22.07     | 341.74  | <0.01        |
| W*Z   | 1.00    | 2.94    | 0.027        | 0.01    | 2.81    | 0.033        | 0.08       | 1.92    | 0.119        | 5.26      | 40.70   | <0.01        |
| Index | VC      |         |              | SS      |         |              | OA         |         |              | Yield     |         |              |
|       | sum.III | F-value | significance | sum.III | F-value | significance | sum.III    | F-value | significance | sum.III   | F-value | significance |
| W     | 44.32   | 1391.99 | <0.01        | 10.20   | 367.04  | <0.01        | 0.01       | 11.42   | <0.01        | 2574.23   | 140.06  | <0.01        |
| Z     | 6.00    | 125.54  | <0.01        | 1.15    | 27.59   | <0.01        | 0.01       | 1.46    | 0.25         | 231.50    | 8.40    | <0.01        |
| W*Z   | 2.04    | 21.31   | <0.01        | 0.58    | 6.93    | <0.01        | 0.01       | 0.05    | 0.999        | 76.92     | 1.40    | 0.293        |
| Index | WUE     |         |              |         |         |              |            |         |              |           |         |              |
|       | sum.III | F-value | significance |         |         |              |            |         |              |           |         |              |
| W     | 57.05   | 11.75   | <0.01        |         |         |              |            |         |              |           |         |              |
| Z     | 830.44  | 114.06  | <0.01        |         |         |              |            |         |              |           |         |              |
| W*Z   | 11.44   | 0.59    | 0.59         |         |         |              |            |         |              |           |         |              |

Note: sum. III represent Class III sum of squares.

Table S2 Grey relational analysis calculation

|       | Ph     | St     | RL     | RV     | RS     | LAI    | Ci     | Pn     | Tr     | Gs     | Ff     | NC     | VC     | SS     | OA     | Yield  | WUE    | Average |
|-------|--------|--------|--------|--------|--------|--------|--------|--------|--------|--------|--------|--------|--------|--------|--------|--------|--------|---------|
| Ph    | 1.0000 | 0.5538 | 0.5098 | 0.5551 | 0.5662 | 0.5431 | 0.6799 | 0.6593 | 0.5614 | 0.5052 | 0.5174 | 0.5828 | 0.5420 | 0.5199 | 0.5028 | 0.8842 | 0.7235 | 0.6165  |
| St    | 0.5538 | 1.0000 | 0.5010 | 0.9877 | 0.5071 | 0.9009 | 0.5193 | 0.6687 | 0.9377 | 0.5484 | 0.6622 | 0.8248 | 0.8906 | 0.6846 | 0.5265 | 0.5700 | 0.6203 | 0.6877  |
| RL    | 0.5098 | 0.501  | 1.0000 | 0.5011 | 0.5738 | 0.5008 | 0.5271 | 0.5031 | 0.5012 | 0.5001 | 0.5003 | 0.5016 | 0.5008 | 0.5004 | 0.5001 | 0.5075 | 0.5044 | 0.5395  |
| RV    | 0.5551 | 0.9877 | 0.5011 | 1.0000 | 0.5073 | 0.891  | 0.5198 | 0.6730 | 0.9488 | 0.5472 | 0.6581 | 0.8330 | 0.8809 | 0.6801 | 0.5258 | 0.5717 | 0.6233 | 0.6883  |
| RS    | 0.5662 | 0.5071 | 0.5738 | 0.5073 | 1.0000 | 0.5057 | 0.6839 | 0.5211 | 0.5081 | 0.5007 | 0.5023 | 0.5110 | 0.5056 | 0.5026 | 0.5004 | 0.5509 | 0.5296 | 0.5607  |
| LAI   | 0.5431 | 0.9009 | 0.5008 | 0.891  | 0.5057 | 1.0000 | 0.5155 | 0.6353 | 0.8509 | 0.5603 | 0.7002 | 0.7604 | 0.9871 | 0.7303 | 0.533  | 0.5561 | 0.5964 | 0.6922  |
| Ci    | 0.6799 | 0.5193 | 0.5271 | 0.5198 | 0.6839 | 0.5155 | 1.0000 | 0.5573 | 0.5221 | 0.5019 | 0.5063 | 0.5298 | 0.5151 | 0.5071 | 0.5010 | 0.6382 | 0.5804 | 0.5806  |
| Pn    | 0.6593 | 0.6687 | 0.5031 | 0.6730 | 0.5211 | 0.6353 | 0.5573 | 1.0000 | 0.6928 | 0.5163 | 0.5547 | 0.7597 | 0.6318 | 0.5623 | 0.5089 | 0.7073 | 0.8564 | 0.6483  |
| Tr    | 0.5614 | 0.9377 | 0.5012 | 0.9488 | 0.5081 | 0.8509 | 0.5221 | 0.6928 | 1.0000 | 0.5423 | 0.6419 | 0.8711 | 0.8419 | 0.6616 | 0.5232 | 0.5799 | 0.6374 | 0.6857  |
| Gs    | 0.5052 | 0.5484 | 0.5001 | 0.5472 | 0.5007 | 0.5603 | 0.5019 | 0.5163 | 0.5423 | 1.0000 | 0.6491 | 0.5314 | 0.5619 | 0.631  | 0.7739 | 0.5068 | 0.5116 | 0.5830  |
| Ff    | 0.5174 | 0.6622 | 0.5003 | 0.6581 | 0.5023 | 0.7002 | 0.5063 | 0.5547 | 0.6419 | 0.6491 | 1.0000 | 0.6053 | 0.7076 | 0.9391 | 0.5817 | 0.5227 | 0.5390 | 0.6305  |
| NC    | 0.5828 | 0.8248 | 0.5016 | 0.8330 | 0.5110 | 0.7604 | 0.5298 | 0.7597 | 0.8711 | 0.5314 | 0.6053 | 1.0000 | 0.7537 | 0.6199 | 0.5172 | 0.6077 | 0.6852 | 0.6709  |
| VC    | 0.5420 | 0.8906 | 0.5008 | 0.8809 | 0.5056 | 0.9871 | 0.5151 | 0.6318 | 0.8419 | 0.5619 | 0.7076 | 0.7537 | 1.0000 | 0.7364 | 0.5339 | 0.5547 | 0.5940 | 0.6719  |
| SS    | 0.5199 | 0.6846 | 0.5004 | 0.6801 | 0.5026 | 0.7303 | 0.5071 | 0.5623 | 0.6616 | 0.6310 | 0.9391 | 0.6199 | 0.7364 | 1.0000 | 0.5717 | 0.5258 | 0.5444 | 0.6367  |
| OA    | 0.5028 | 0.5265 | 0.5001 | 0.5258 | 0.5004 | 0.533  | 0.5010 | 0.5089 | 0.5232 | 0.7739 | 0.5817 | 0.5172 | 0.5339 | 0.5717 | 1.0000 | 0.5037 | 0.5064 | 0.5673  |
| Yield | 0.8842 | 0.5700 | 0.5075 | 0.5717 | 0.5509 | 0.5561 | 0.6382 | 0.7073 | 0.5799 | 0.5068 | 0.5227 | 0.6077 | 0.5547 | 0.5258 | 0.5037 | 1.0000 | 0.7908 | 0.6264  |
| WUE   | 0.7235 | 0.6203 | 0.5044 | 0.6233 | 0.5296 | 0.5964 | 0.5804 | 0.8564 | 0.6374 | 0.5116 | 0.5390 | 0.6852 | 0.5940 | 0.5444 | 0.5064 | 0.7908 | 1.0000 | 0.6404  |

Table S3 Eigenvalues and Cumulative Variance Contribution Rates of Tomato Evaluation Factors

| Ingredient | Eigenvalues | variance<br>contribution rate (%) | Cumulative variance<br>contribution rate (%) |
|------------|-------------|-----------------------------------|----------------------------------------------|
| 1          | 8.527       | 77.521                            | 77.521                                       |
| 2          | 1.794       | 16.310                            | 93.831                                       |
| 3          | 0.446       | 4.056                             | 97.887                                       |
| 4          | 0.091       | 0.826                             | 98.714                                       |
| 5          | 0.062       | 0.568                             | 99.281                                       |
| 6          | 0.031       | 0.278                             | 99.559                                       |
| 7          | 0.021       | 0.191                             | 99.750                                       |
| 8          | 0.013       | 0.115                             | 99.865                                       |
| 9          | 0.010       | 0.089                             | 99.954                                       |
| 10         | 0.005       | 0.044                             | 99.998                                       |
| 11         | 0.000       | 0.002                             | 100.000                                      |

Table S4 Factor loading matrix of principal components on each index

| Index | Main ingredient |        |
|-------|-----------------|--------|
|       | 1               | 2      |
| RV    | 0.979           | 0.071  |
| St    | 0.971           | 0.204  |
| Tr    | 0.951           | 0.240  |
| VC    | -0.851          | 0.471  |
| NC    | -0.879          | 0.446  |
| Pn    | 0.961           | 0.247  |
| WUE   | -0.136          | 0.884  |
| SS    | -0.857          | 0.487  |
| Ff    | -0.978          | -0.113 |
| Yield | 0.836           | 0.378  |
| Ph    | 0.945           | 0.180  |
